# Supplementary material
Source: ML conference proceedings conference paper supplement (https://aclanthology.org/2023.ranlp-stud.11)
Supplement: OptionalSupplementaryMaterial [file Supp material - RANLP.pdf › Supp material - RANLP.pdf]

## Supplementary Material

### 1. *signatorily*

**Affix:** *-ly*, productive

**Humanlike definition:** Adverb, by means of *or* like writing one's signature/ official seeming/ related to a signal

### 2. *assemblyless*

**Affix:** *-less*, productive

**Humanlike definition:** Adjective, lacking in an assembly(n)/ not assembled or unable to be assembled, assembly as a generic gathering of people or specific type of assembly (legislative, school, etc.)

### 3. *benchish*

**Affix:** *-ish*, productive

**Humanlike definition:** Adjective, like a bench in appearance or function/ of a person or object worthy of being benched (made to sit out)/ as if from a bench (seated position) i.e. lazy

### 4. *delveable*

**Affix:** *-able*, productive

**Humanlike definition:** Adjective, able to be explored, of a topic/concept able to be explored literally/physically (like a cave)

### 5. *lunchify*

**Affix:** *-ify*, productive

**Humanlike definition:** Verb, make lunch-like in some way, of a food or of an activity

### 6. *palatialise*

**Affix:** *-ise*, unproductive

**Humanlike definition:** Verb, change/modify, make grander or bigger or more opulent

### 7. *violinous*

**Affix:** *-ous*, unproductive

**Humanlike definition:** Adjective, violin-like quality in sound or appearance, of music/of an object/of a composition

### 8. *musksome*

**Affix:** *-some*, unproductive

**Humanlike definition:** Adjective, of an odour, earthy, pungent, strong, overpowering, unpleasant

### 9. *containary*

**Affix:** *-ary*, unproductive

**Humanlike definition:** Noun, place to store

containers/assortment of containers/large container

*or*

Adjective, physically container-like/full of containers

### 10. *shallowen*

**Affix:** *-en*, unproductive

**Humanlike definition:** Verb, make something shallow (analogous to deepen), literally or figuratively shallow

*or*

Noun, a container/the shallow part of a water body/a race or species (as in 'heathen' perhaps)
